# Supplementary material for: Temporal stability of naturally acquired immunity to Merozoite Surface Protein-1 in Kenyan Adults
Source: PubMed Central journal article supplement (PMC2719655; doi:10.1186/1475-2875-8-162), 2009-07-16
Supplement: 1475-2875-8-162-S5.pdf [file 1475-2875-8-162-S5.pdf]

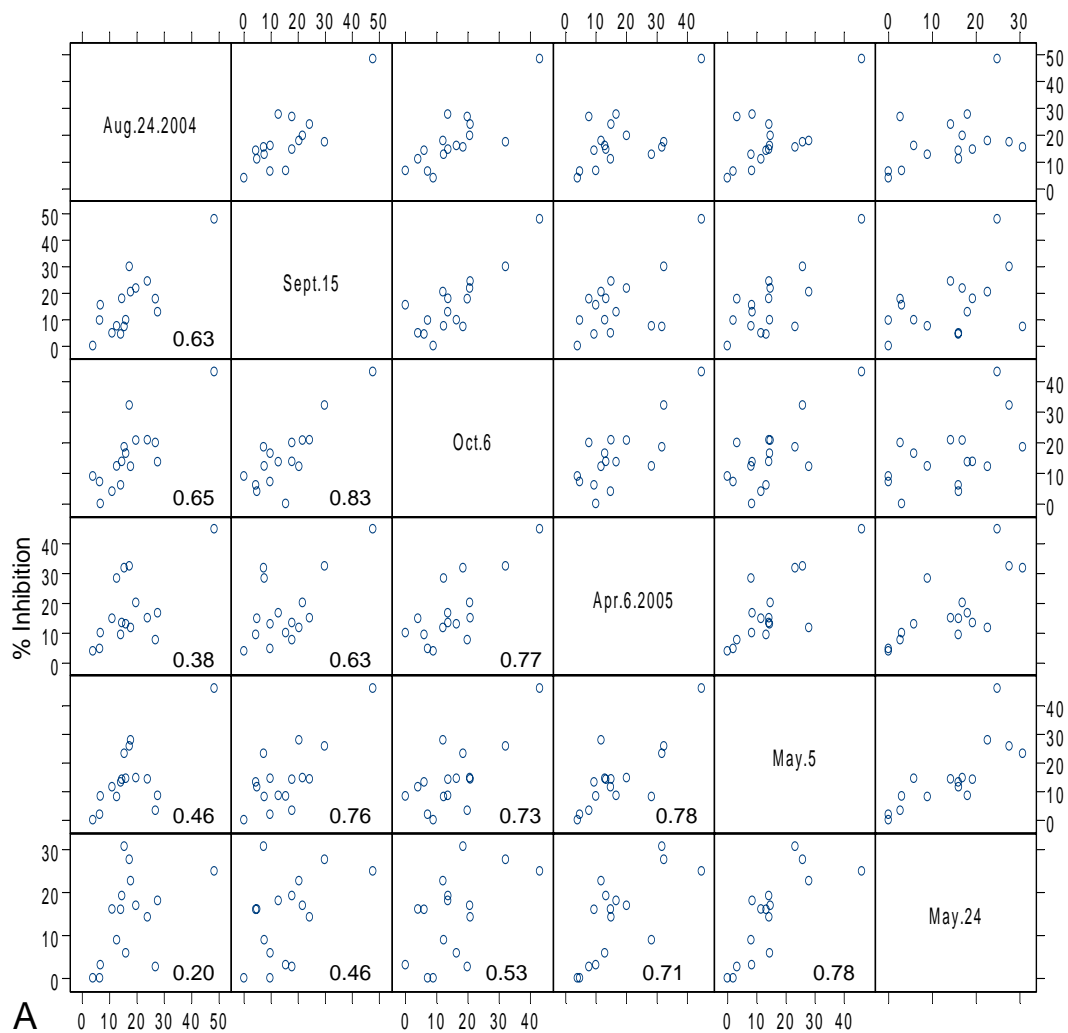

Supplementary Figure 5: A: GIA measured responses compared between all time points with Pearson's correlation  $R^2$  value in the bottom right corner of each comparison. B: GIA data for each individual at each time point.

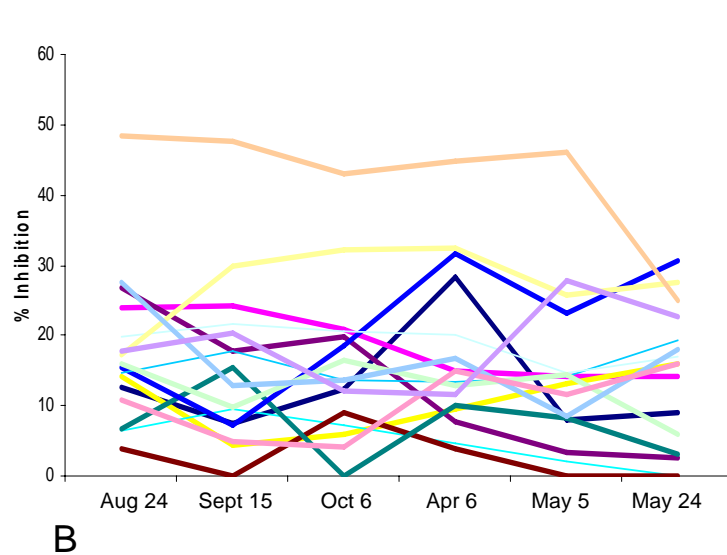

A

B
